## Machine learning-based equations for improved body composition estimation in Indian adults

Nick Birk<sup>1</sup>, Bharati Kulkarni<sup>2</sup>, Santhi Bhogadi<sup>3</sup>, Aastha Aggarwal<sup>4</sup>, Gagandeep Kaur Walia<sup>4</sup>, Vipin Gupta<sup>5</sup>, Usha Rani<sup>6</sup>, Hemant Mahajan<sup>6</sup>, Sanjay Kinra<sup>1\*</sup>, Poppy AC Mallinson<sup>1\*</sup>

<sup>1</sup>Department of Non-Communicable Disease Epidemiology, London School of Hygiene & Tropical Medicine, UK

<sup>2</sup>Reproductive and Child Health and Nutrition, Indian Council of Medical Research, India

<sup>3</sup>Indian Institute of Public Health Bengaluru, India

<sup>4</sup>Public Health Foundation of India, India

<sup>5</sup>Department of Anthropology, University of Delhi, India

<sup>6</sup>Clinical Division, ICMR National Institute of Nutrition, India

\*Contributed equally

Correspondence to:

*Poppy AC Mallinson*

*Email (preferred): [poppy.mallinson1@lshtm.ac.uk](mailto:poppy.mallinson1@lshtm.ac.uk)*

*Mailing address: Department of Non-Communicable Disease Epidemiology, London School of Hygiene & Tropical Medicine, Keppel Street, London, WC1E 7HT, UK*

*Telephone: +44(0)20 7927 2088*

Financial support:

The Andhra Pradesh Children and Parents' Study third follow-up was funded by the Wellcome Trust [strategic award 084774]. Authors NB, PACM and SK receive part of their salary from the Medical Research Council (MRC) UK [grant reference MR/V001221/1]. Neither the Wellcome Trust nor the MRC had any role in the design, analysis or writing of this article.

Abbreviations:

APCAPS - Andhra Pradesh Children and Parents Study; BIA - Bioelectrical impedance analysis; BMI - Body mass index; BSI – Body shape index; CAMA - Corrected arm muscle area; DXA - Dual-energy X-ray absorptiometry; FMI - Fat mass index; LASSO - Least absolute selection and shrinkage operator; LMI – Lean mass index; MAE – Mean absolute error; MAPE – Mean average percentage error; MRI - Magnetic resonance imaging; RMSE – Root mean square error

1 Abstract

2 Bioelectrical impedance analysis (BIA) is commonly used as a lower-cost measurement of body  
3 composition as compared to dual-energy X-ray absorptiometry (DXA) and magnetic resonance imaging  
4 (MRI) in large-scale epidemiological studies. However, existing equations for body composition based on  
5 BIA measures may not generalize well to all settings.

6 We combined BIA measurements (TANITA BC-418) with skinfold thickness, body circumferences, and  
7 grip strength to develop equations to predict six DXA-measured body composition parameters in a  
8 cohort of Indian adults using machine learning techniques. The participants were split into training (80%,  
9 1297 males and 1133 females) and testing (20%, 318 males and 289 females) data to develop and  
10 validate the performance of equations for total body fat mass (kg), total body lean mass (kg), total body  
11 fat percentage (%), trunk fat percentage (%), L1-L4 fat percentage (%), and total appendicular lean mass  
12 (kg), separately for males and females. Our novel equations outperformed existing equations for each of  
13 these body composition parameters. For example, the mean absolute error for total body fat mass was  
14 1.808 kg for males and 2.054 kg for females using the TANITA's built-in estimation algorithm, 2.105 kg  
15 for males and 2.995 kg for females using Durnin-Womersley equations, and 0.935 kg for males and  
16 0.976 kg for females using our novel equations.

17 These equations may provide improved estimation of body composition in research and clinical contexts  
18 conducted in India and will be made available as an online application for use in future research in these  
19 populations.

20 Keywords: Body composition, adiposity, bioelectrical impedance, prediction equations, machine  
21 learning, India.

22

23 **Manuscript**

24 **Background**

25 Measurements of body composition, such as body fat percentage, can provide meaningful health-  
26 related insights. Total body fat and intra-abdominal fat have been previously associated with metabolic  
27 syndrome<sup>1</sup>, while lean body mass can be protective against chronic diseases and age-related adverse  
28 conditions<sup>2,3</sup>. Further, there is some evidence that these relationships are particularly pronounced in  
29 adults of South Asian ethnicities<sup>1,2</sup>, underscoring the importance of accurately recording these body  
30 composition metrics in epidemiological studies. While many studies of individuals of South Asian  
31 ethnicities use metrics such as overall weight and body mass index (BMI), these metrics may fail to  
32 distinguish between fat mass and lean mass, and therefore provide an incomplete assessment of body  
33 composition<sup>4,5</sup>. Thus, there is clinical and public health relevance in more accurately, and separately,  
34 characterizing both fat and lean components of body weight in South Asian populations. It should be  
35 noted that the label of ‘South Asian’ is used throughout this manuscript to refer to people who identify  
36 as having ancestral origin from countries in the South Asian region (defined by the World Bank as India,  
37 Pakistan, Bangladesh, Sri Lanka, Nepal, Bhutan and the Maldives) and may share tradition, diet, and  
38 values. By using this terminology, we do not mean to imply that any such differences are genetic in  
39 origin, or that South Asians, or Indians, represent a single ethnic or cultural group.

40 Bioelectrical impedance analysis (BIA) is commonly used as a feasible, lower-cost measurement of body  
41 composition in population-based studies as compared to dual-energy X-ray absorptiometry (DXA) and  
42 magnetic resonance imaging (MRI)<sup>6</sup>. Commercially and clinically available BIA devices, such as TANITA  
43 body composition analyzers, utilize inbuilt equations to estimate total and segmental lean and fat mass  
44 from a combination of body segment impedance values, sex, height, and weight<sup>7</sup>. However, these  
45 prediction equations were generally developed and validated in predominately European ethnic

46 populations and may not generalize to other ethnic groups<sup>8,9</sup>. A study of 200 healthy Asian Indian  
47 individuals found that in-built equations based on white ethnic populations from a TANITA analyzer  
48 underestimated total body fat percentage by 8.3%, or by 5.4% when using equations fit based on  
49 individuals of Japanese ethnicity, compared with DXA-derived values<sup>10</sup>. A study of 39 Indian adults found  
50 that BIA methods underestimated fat mass as compared to four-compartment model, suggesting  
51 population-specific equations are needed<sup>11</sup>. Another study of healthy Indian adult men found that  
52 existing BIA equations tended to underestimate body fat compared with deuterium oxide dilution as a  
53 reference method<sup>12</sup>, while studies among Indian children have reported both under- and over-  
54 estimation of body fat percentage as compared to DXA-derived values<sup>13–15</sup>. Validation studies have  
55 previously demonstrated that impedance analysis led to underestimation of total body water, a  
56 component of lean mass, in Indian adults<sup>16</sup>.

57 The relative inaccuracy of BIA-based body composition estimation in Asian Indians compared with white  
58 populations may be related to the observed differences in body composition between White and Asian  
59 Indian adults<sup>17</sup>. In particular, Indian men and women have been found to have higher body fat  
60 percentage than their European ethnic counterparts of the same BMI<sup>18–20</sup>. The findings of Rush et al  
61 suggest that this difference may be related to the presence of higher abdominal fat mass and lower  
62 appendicular muscle mass among Asian Indian adults as compared to European, Maori, and Pacific  
63 Island ethnic adults after adjustment for age, height, and weight<sup>18</sup>. Further, a study of multiple  
64 community-based cohorts in the United States found that adults of South Asian ethnicity tended to have  
65 less lean mass overall than adults of other ethnic backgrounds<sup>21</sup>. Consequently, there is a relatively high  
66 prevalence of “normal weight obesity” in India<sup>22,23</sup>. The precise mechanisms responsible for these  
67 differences remain subject to debate, though may relate to exposure to common environmental  
68 factors<sup>24</sup>. Nonetheless, because of these differences in the presentation of adiposity, there is a need for  
69 better methods to estimate body composition in Asian Indian populations<sup>17</sup>. We are aware of one study

70 that developed a novel BIA-based equation to predict DXA-derived body fat among young adult Indian  
71 males<sup>25</sup>, and another that developed lean body mass equations in people of Indian Asian ethnicity living  
72 in New Zealand<sup>17</sup>, but both had relatively small samples. Furthermore, no Indian-specific equations are  
73 available for estimation of central body fat, which may be particularly relevant for understanding  
74 cardiometabolic risks in Indian adults.

75 While BIA-based methods are increasingly popular for measuring body composition in research and  
76 clinical contexts, other prediction equations for body composition based on simple physical  
77 measurements have been previously developed. For example, the Durnin-Womersley equations are  
78 frequently used in epidemiological studies for estimating body fat percentage from skinfold  
79 measurements<sup>26</sup>. However, studies also suggest these equations perform less well in Asian (and other  
80 non-white) ethnic groups compared with white populations<sup>27</sup> and indicate the potential of such  
81 anthropometric measures to further improve body composition estimation equations through  
82 recalibration to specific populations<sup>28</sup>.

83 The aim of the current work is to develop novel algorithms to predict DXA-derived fat and lean mass  
84 metrics calibrated for an adult Indian population. We use the BIA-based default predictions from the  
85 TANITA BC-418 (a widely used segmental body composition analyser) as a performance baseline, and  
86 then incorporate additional predictors from the TANITA output alongside potentially relevant  
87 anthropometric measures related to body stature, adiposity, and muscularity (namely age, standing  
88 height, circumferences, skinfolds, and grip strength). We evaluate the performance of the model against  
89 DXA-derived body composition metrics in a held-out sample. We explore various combinations of  
90 predictors and prediction methods, including penalized regression and non-parametric machine learning  
91 algorithms. The best-performing prediction equations for various combinations of predictor variables  
92 will be made available online for clinical and research use.

93 Methods

94 *Study Population*

95 The present analysis makes use of data from the third wave of follow-up in the Andhra Pradesh Children  
96 and Parents Study (APCAPS), in which segmental BIA measurements were obtained. Details of the  
97 APCAPS have been published previously<sup>29</sup>. In summary, the study's baseline data collection took place in  
98 2003-2005 for children whose mothers were involved in the Hyderabad Nutrition Trial from 1987-1990.  
99 These children were followed up again in a second wave of data collection in 2009-2010, and the study  
100 expanded to also include their siblings and parents during the third wave of data collection in 2010-  
101 2012. During this third wave of data collection, a random subset of the study participants were invited  
102 for DXA scanning except those who reported for pregnancy. The present analysis is restricted to adults  
103 in the APCAPS third wave that consented to DXA scanning, as the second wave of follow-up did not  
104 include any BIA measurements.

105 The APCAPS third wave follow-up study was conducted according to the guidelines laid down in the  
106 Declaration of Helsinki and all procedures involving human participants were approved by ethics  
107 committees of the Indian Council of Medical Research - National Institute of Nutrition, India (reference  
108 number: A2-2009), the Public Health Foundation of India, India (reference number 52/10), and the  
109 London School of Hygiene and Tropical Medicine, UK (reference number: 6471). Written informed  
110 consent was obtained from all participants (or witnessed thumbprint if illiterate).

111 *Data Collection*

112 A portable TANITA bioelectrical impedance analyzer (model BC-418 M57NA, TANITA) was used to  
113 measure segmental impedance values. To take a measurement, researchers entered the participant's  
114 age, sex, and height into the TANITA machine, then requested participants to stand up straight on the

115 weighing platform in bare feet (with feet in contact with the lower electrodes), while holding onto the  
116 hand grips (with hands in contact with the upper electrodes) until a complete impedance reading shows  
117 on the display. To reduce measurement variability, readings were taken in the morning following an  
118 overnight fast. Height was measured twice to the nearest 1 mm using a portable stadiometer (Leicester  
119 height measure), circumferences (hip, waist, calf, head, chest inhaling, chest exhaling, mid arm) were  
120 measured twice to the nearest 1 mm using a non-stretch metallic tape measure, skinfolds (tricep, bicep,  
121 subscapular, suprailiac, calf) were measured three times to the nearest 0.2 mm using Holtain caliper,  
122 and grip strength was measured in kg four times using Lafayette 78010 hand-held dynamometer; the  
123 average of each of these measurements were used as a single value in analysis. DXA body composition  
124 values were measured using a Hologic Discovery A device with Hologic spine phantom 14855 used as a  
125 phantom. The participants were instructed to lay supine with their arms resting by their sides. Standard  
126 Hologic software defined the head, trunk, legs, and arms. DXA L1-L4 regions were defined by marking  
127 the region from the midpoint of the T12 and L1 vertebrae to the midpoint of the L4 and L5 vertebrae in  
128 Hologic software<sup>30</sup>. The total mass, fat mass, and fat percentage were computed within this bounded  
129 region for each participant. The L1-L4 scan analyses were performed twice for each participant, and the  
130 average of these repeated values was used. This body segment has been used in previous studies as a  
131 more valid measure of abdominal fat than trunk fat, since the trunk includes additional body regions  
132 such as the chest and pelvis as well as the abdomen<sup>31,32</sup>.

### 133 *Data Preparation and Statistical Analysis*

134 Participants were removed from the dataset if they had any missing data or if any of their measurement  
135 values were judged to be implausible suggesting machine or data entry error (see Supplementary  
136 Material (File 1) for a list of the criteria applied). To account for potential bias/overfitting, the dataset  
137 was then split into training and testing groups by randomly selecting rows with 80% of individuals used

138 to fit models and the other 20% used to validate the performance of the models. We explored use of the  
139 Least Absolute Selection and Shrinkage Operator (LASSO), random forest, and XGBoost algorithms for  
140 developing our prediction equations, as these represent popular parametric (LASSO) and non-  
141 parametric, tree-based (random forest, XGBoost) machine learning algorithms. The LASSO model also  
142 provides the benefit of automatic feature selection, while random forest and XGBoost allow for more  
143 flexible modeling of non-linear relationships between predictors. These algorithms were each used to fit  
144 models predicting 6 different DXA-derived outcomes: total body fat (kg), total body lean mass (kg), total  
145 body fat percentage (%), trunk fat percentage (%), L1-L4 fat percentage (%), and appendicular lean mass  
146 (kg). These six measures were selected as the focus of this paper as they are commonly reported in  
147 published research. For completeness, results based on other measures estimated by the DXA machine  
148 (trunk fat mass (kg), trunk lean mass (kg), L1-L4 fat mass (kg), L1-L4 lean mass (kg), appendicular fat  
149 mass (kg), and appendicular fat mass percentage (%)) are provided in the Supplementary Material (File  
150 4).

151 The TANITA BC-418 device provides several outputs for the defined body segments of full body, trunk,  
152 left arm, right arm, left leg, and right leg. The following measurements as displayed in the TANITA  
153 output were used as predictors for each of these segments unless indicated otherwise: segment fat  
154 mass, segment fat-free mass, segment muscle mass (all but full body), segment fat percentage, segment  
155 impedance. Additionally, body weight, BMI, and total body water were used as predictors. Additional  
156 covariates included to potentially improve the predictive performance of the equations were age,  
157 standing height, calf circumference, head circumference, exhalation chest circumference, waist  
158 circumference, hip circumference, arm circumference, tricep skinfold, bicep skinfold, subscapular  
159 skinfold, suprailiac skinfold, calf skinfold, dominant hand grip strength, and non-dominant hand grip  
160 strength.



161 Certain data transformations and interactions were pre-specified for inclusion in the models if deemed  
162 to be relevant by the researchers based on review of the literature and potential utility in measuring  
163 muscle mass. These interactions and transformations were waist-to-hip ratio, waist-to-height ratio,  
164 chest-to-waist ratio, calf-to-height ratio, height-squared-to-impedance ratio for each impedance value,  
165 fat mass index (FMI), lean mass index (LMI), body shape index (BSI), corrected arm muscle area (CAMA),  
166 logarithm of the sum of skinfolds, and the product of age and dominant hand grip strength. Additionally,  
167 we originally included squared terms for each input variable to account for non-linear associations with  
168 the outcome and included additional speculative interaction terms to account for complex relationships  
169 between predictors. However, the inclusion of these terms did not result in considerable performance  
170 improvements, and in some cases worsened model performance due to overfitting. To maintain  
171 parsimony while still including potentially meaningful interactions, we used the reduced set of  
172 interaction terms described above in the present analysis.

173 The models were fit separately by sex and performance was compared in the validation data via mean  
174 absolute error (MAE), mean average percentage error (MAPE), and root mean squared error (RMSE).  
175 RMSE was used to provide comparison to existing studies, while MAE and MAPE were utilized due to  
176 their interpretability. The built-in TANITA estimates for each outcome alone were used as a performance  
177 baseline. Since TANITA does not define the L1-L4 region, TANITA trunk values were used as the  
178 performance baseline for this outcome. Further, we compared the performance of our models to  
179 previously derived prediction equations by Kulkarni et al for use in Indian populations for the total body  
180 lean mass and appendicular lean mass outcomes<sup>28</sup> and to Durnin-Womersley equations for total body  
181 fat outcomes<sup>26</sup>. The lambda value of the LASSO model, the mtry value of the random forest model, and  
182 the max depth, eta, and gamma parameters of the XGBoost model were tuned in the training data using  
183 10-fold cross validation for each outcome.

184 As a post hoc sensitivity analysis, models were fit using the LASSO algorithm with only the full set of  
185 TANITA inputs and relevant transformations, full set of TANITA inputs along with one of the three sets of  
186 additional anthropometric variables and their transformations (skinfolds, circumferences, and grip  
187 strength), all circumferences alone, and all circumferences and skinfolds and their transformations.  
188 These additional equations and their performance are provided in the Supplementary Material (File 2  
189 and File 3). Age and standing height are still included as predictors in each of these models since it is  
190 assumed these values influence the body composition and can be easily obtained by researchers.  
191 All analyses were completed using R software version 4.2.0.

## 192 Results

193 The details of selecting the study participants are described in a flowchart as Figure 1. The application of  
194 inclusion criteria resulted in a sample size of 1615 males and 1422 females (training dataset of 1297  
195 males and 1133 females and validation dataset of 318 males and 289 females). Individuals who did not  
196 participate in the DXA study within APCAPS 3<sup>rd</sup> follow-up tended to be younger on average than  
197 individuals who had DXA measurements available (34 years old and 38 years old, respectively), though  
198 BMI was similar in the two groups (data not shown). The characteristics of our final study cohort are  
199 described in Table 1. Males and females were of similar age (37 years and 38 years old on average,  
200 respectively, in both training and test datasets) and with similar BMI (approximately 20-21 kg/m<sup>2</sup> in all  
201 groups). Within the same sex, the average value of each mass outcome (total body fat mass, total body  
202 lean mass, appendicular lean mass) did not differ by more than 0.51 kg between training and test  
203 datasets and each percentage outcome (total body fat percentage, trunk fat percentage, L1-L4 fat  
204 percentage) did not differ by more than 0.75 percentage points between training and test datasets.

205 Figure 1: Flow-chart for inclusion in the present analysis

206 [Insert Figure 1 here]

207 Table 1: Description of the sample

|                                          | <b>Training –<br/>Females<br/>(n = 1133)</b> | <b>Test –<br/>Females<br/>(n = 289)</b> | <b>Training –<br/>Males<br/>(n = 1297)</b> | <b>Test – Males<br/>(n = 318)</b> |
|------------------------------------------|----------------------------------------------|-----------------------------------------|--------------------------------------------|-----------------------------------|
| <b>Age (years)</b>                       | 38.17 (11.7)                                 | 39.05 (11.3)                            | 37.15 (15.5)                               | 36.68 (15.5)                      |
| <b>Standing height (cm)</b>              | 151.68 (5.89)                                | 151.20 (6.05)                           | 164.26 (6.67)                              | 164.27 (7.01)                     |
| <b>Weight (kg)</b>                       | 48.57 (9.20)                                 | 48.39 (9.48)                            | 55.46 (10.53)                              | 54.46 (11.42)                     |
| <b>BMI (kg/m<sup>2</sup>)</b>            | 21.14 (3.71)                                 | 21.22 (3.85)                            | 20.55 (3.43)                               | 20.15 (3.72)                      |
| <b>DXA Total body fat mass (kg)</b>      | 15.61 (5.21)                                 | 15.46 (5.25)                            | 10.68 (4.98)                               | 10.26 (5.17)                      |
| <b>DXA Total body lean mass (kg)</b>     | 32.03 (4.56)                                 | 32.00 (4.95)                            | 43.52 (6.41)                               | 43.01 (7.13)                      |
| <b>DXA Total body fat percentage (%)</b> | 30.92 (5.55)                                 | 30.73 (5.72)                            | 18.25 (5.64)                               | 17.74 (5.67)                      |
| <b>DXA Trunk fat percentage (%)</b>      | 27.02 (6.98)                                 | 26.95 (7.16)                            | 16.84 (6.56)                               | 16.09 (6.52)                      |
| <b>DXA L1-L4 fat percentage (%)</b>      | 25.80 (7.71)                                 | 25.75 (7.92)                            | 18.57 (7.69)                               | 17.83 (7.64)                      |
| <b>DXA Appendicular lean mass (kg)</b>   | 13.11 (2.01)                                 | 13.01 (2.25)                            | 19.18 (2.95)                               | 19.04 (3.36)                      |

208 All values presented as mean (SD)

209 In general, LASSO models achieved the best performance in the testing data for the 6 outcomes based  
 210 on each observed performance metric. The performance as measured by MAE of LASSO, random forest,  
 211 and XGBoost algorithms with the full set of predictors can be found in Table 2. In summary, the LASSO  
 212 achieved the lowest MAE in the test data for the majority of outcome-sex pairs. The exceptions to this  
 213 were for prediction of trunk fat percentage in males (MAE of 2.094% by LASSO vs MAE of 2.090% by  
 214 XGBoost), L1-L4 fat percentage in males (MAE of 2.401% by LASSO vs MAE of 2.369% by random forest),  
 215 total body fat percentage in females (MAE of 2.165% by LASSO vs MAE of 2.104% by random forest),  
 216 and trunk fat percentage in females (MAE of 2.721% by LASSO vs MAE of 2.622% by random forest).  
 217 Despite occasional performance gains by the random forest and XGBoost algorithms, we ultimately  
 218 favor the LASSO algorithm for its comparative interpretability and ease of application to future data. The

219 performance of the LASSO models created for each outcome-sex pair as described by additional

220 performance metrics MAPE and RMSE is also provided in Table 2.

221 Table 2: Mean Absolute Error (compared with DXA-based measurement) for different prediction  
 222 algorithms using all predictors in test data, and additional performance metrics for best model (n = 289  
 223 female, 318 male)

| <b>Outcome (Sex)</b>                     | <b>Random Forest Mean absolute error</b> | <b>XGBoost Mean absolute error</b> | <b>LASSO Mean absolute error</b> | <b>LASSO Root Mean Squared Error</b> | <b>LASSO Mean Absolute Percentage Error</b> |
|------------------------------------------|------------------------------------------|------------------------------------|----------------------------------|--------------------------------------|---------------------------------------------|
| <b>Total body fat mass (kg) – M</b>      | 1.057                                    | 1.013                              | 0.935                            | 1.19                                 | 10.06%                                      |
| <b>Total body fat mass (kg) - F</b>      | 1.014                                    | 1.052                              | 0.976                            | 1.26                                 | 6.94%                                       |
| <b>Total body lean mass (kg) - M</b>     | 1.311                                    | 1.378                              | 1.177                            | 1.52                                 | 2.76%                                       |
| <b>Total body lean mass (kg) - F</b>     | 1.308                                    | 1.357                              | 1.222                            | 1.55                                 | 3.85%                                       |
| <b>Total body fat percentage (%) - M</b> | 1.746                                    | 1.804                              | 1.668                            | 2.10                                 | 9.87%                                       |
| <b>Total body fat percentage (%) - F</b> | 2.104                                    | 2.125                              | 2.165                            | 2.73                                 | 7.44%                                       |
| <b>Trunk fat percentage (%) - M</b>      | 2.121                                    | 2.090                              | 2.094                            | 2.62                                 | 13.81%                                      |
| <b>Trunk fat percentage (%) - F</b>      | 2.622                                    | 2.652                              | 2.721                            | 3.42                                 | 11.15%                                      |
| <b>L1-L4 fat percentage (%) - M</b>      | 2.369                                    | 2.417                              | 2.401                            | 2.99                                 | 14.92%                                      |
| <b>L1-L4 fat percentage (%) - F</b>      | 2.971                                    | 2.970                              | 2.929                            | 3.75                                 | 12.41%                                      |
| <b>Appendicular lean mass (kg) - M</b>   | 0.900                                    | 0.853                              | 0.782                            | 1.04                                 | 4.18%                                       |
| <b>Appendicular lean mass (kg) - F</b>   | 0.833                                    | 0.860                              | 0.790                            | 1.00                                 | 6.17%                                       |

224 M is male; F is female.

225 Our novel equations, as well as the other equations previously developed by Kulkarni et al in an Indian

226 population, performed substantially better than the built-in TANITA estimates and Durnin-Womersley

227 equations. For 5 out of the 12 outcome-sex pairs, the mean absolute error of our best equation was less

228 than half that of the TANITA built-in estimate or Durnin-Womersley equation. For example, mean  
229 absolute error for total body fat mass was 1.808 kg for males and 2.054 kg for females using TANITA  
230 estimation, 2.105 kg for males and 2.995 kg for females using Durnin-Womersley equations, 1.240 kg for  
231 males and 1.061 kg for females using our novel equation with just TANITA values, and 0.935 kg for males  
232 and 0.976 kg for females using our novel equation with TANITA, skinfolds, circumferences, and grip  
233 strength. The mean absolute error for a subset of the LASSO equations (TANITA predictors only, TANITA  
234 and skinfold as predictors, and full set of predictors), TANITA built-in estimates, and existing equations  
235 as compared to the DXA values are presented in Table 3. In all instances, the best performance in the  
236 test data was achieved by our novel equations (built using LASSO algorithm) with all measurements, that  
237 is TANITA, circumferences, skinfolds, and grip strength, included. However, similar performance was  
238 sometimes achieved through inclusion of only TANITA and skinfolds. The performance metrics for  
239 further combinations of measurements are made available in the Supplementary Material (File 3).  
240 Briefly, the combination of TANITA and circumferences occasionally led to improved performance from  
241 TANITA predictors only, though these performance gains were generally not as large as those achieved  
242 by the combination of TANITA and skinfolds. The combination of TANITA and grip strength provided only  
243 marginal improvements upon the use of TANITA predictors alone. Bland-Altman plots are provided in  
244 Figure 2 to compare predictive performance of our full LASSO equations to that of the TANITA default  
245 outputs. Overall, there do not appear to be clear systematic errors in the predictions resulting from our  
246 equations, though total fat percentage in women and trunk fat percentage in both men and women may  
247 be frequently overestimated by our models among individuals with lower trunk fat percentage. Further,  
248 our equations may underestimate appendicular lean mass among women with higher appendicular lean  
249 mass. The TANITA device appears to frequently underpredict the fat mass of women with lower body fat  
250 mass.

251 Table 3: Mean Absolute Error (compared with DXA-based measurement) for the different prediction  
 252 models in test data (n = 289 female, 318 male)

| Outcome (Sex)                     | Mean absolute error compared with DXA measurement |                                            |                  |                              |                                                                                  |
|-----------------------------------|---------------------------------------------------|--------------------------------------------|------------------|------------------------------|----------------------------------------------------------------------------------|
|                                   | TANITA Built-in estimate alone                    | Existing skinfold/ anthropometric equation | All TANITA LASSO | All TANITA + Skinfolks LASSO | All TANITA + Grip strength + circumferences + skinfolks LASSO (I.e., Full LASSO) |
| Total body fat mass (kg) - M      | 1.808 <sup>a</sup>                                | 2.105 <sup>f</sup>                         | 1.240            | 1.003                        | 0.935                                                                            |
| Total body fat mass (kg) - F      | 2.054 <sup>a</sup>                                | 2.995 <sup>f</sup>                         | 1.061            | 1.016                        | 0.976                                                                            |
| Total body lean mass (kg) - M     | 2.782 <sup>b</sup>                                | 1.746 <sup>g</sup>                         | 1.401            | 1.230                        | 1.177                                                                            |
| Total body lean mass (kg) - F     | 2.670 <sup>b</sup>                                | 1.402 <sup>g</sup>                         | 1.276            | 1.234                        | 1.222                                                                            |
| Total body fat percentage (%) - M | 3.242 <sup>c</sup>                                | 3.646 <sup>f</sup>                         | 2.202            | 1.801                        | 1.668                                                                            |
| Total body fat percentage (%) - F | 4.256 <sup>c</sup>                                | 5.656 <sup>f</sup>                         | 2.298            | 2.193                        | 2.165                                                                            |
| Trunk fat percentage (%) - M      | 3.479 <sup>d</sup>                                | ---                                        | 2.574            | 2.298                        | 2.094                                                                            |
| Trunk fat percentage (%) - F      | 5.837 <sup>d</sup>                                | ---                                        | 2.922            | 2.823                        | 2.721                                                                            |
| L1-L4 fat percentage (%) - M      | 3.883 <sup>d</sup>                                | ---                                        | 2.859            | 2.596                        | 2.401                                                                            |
| L1-L4 fat percentage (%) - F      | 5.494 <sup>d</sup>                                | ---                                        | 3.184            | 3.081                        | 2.929                                                                            |
| Appendicular lean mass (kg) - M   | 1.778 <sup>e</sup>                                | 0.972 <sup>g</sup>                         | 0.926            | 0.826                        | 0.782                                                                            |
| Appendicular lean mass (kg) - F   | 1.548 <sup>e</sup>                                | 0.888 <sup>g</sup>                         | 0.811            | 0.804                        | 0.790                                                                            |

253 M is male; F is female. a: TANITA fat mass; b: TANITA fat-free mass; c: TANITA total body fat percentage;  
 254 d: TANITA trunk fat percentage; e: Sum of TANITA right arm fat-free mass, left arm fat-free mass, right  
 255 leg fat-free mass, left leg fat-free mass; f: Durnin-Womersley skinfold equations; g: Kulkarni et al Indian-  
 256 calibrated anthropometric equations.

257

258 Figure 2: Bland-Altman Plots comparing the LASSO with all variables and TANITA Equivalent Measure  
 259 alone to DXA values

260 [Insert figure 2 here]

261

262 The full set of coefficients for LASSO-derived prediction equations are made available online. The  
263 coefficients for each outcome-sex pair in the LASSO model with all sets of predictors are provided in the  
264 Supplementary Material (File 2). Each row of this table contains an input measure, and each column  
265 describes the sex, outcome measure, and intended set of inputs. For example, the column “total fat  
266 percentage male Tanita only” provides the set of coefficients for predicting total body fat percentage  
267 among males using only the set of TANITA inputs. The predicted value is generated by multiplying each  
268 input by its corresponding coefficient from the model of interest and summing together the results  
269 (along with the intercept term), as in a standard linear regression model. The coefficient value appears  
270 as NA in the table for any predictors that are not used in the corresponding model (e.g. skinfolds in the  
271 “Tanita only” model). Estimations can be easily derived from this table using vector multiplication in  
272 statistical software. The MAE values for LASSO models with additional sets of predictors are provided in  
273 the Supplementary Material (File 3). Performance metrics for additional body composition metrics (e.g.  
274 appendicular fat mass) which were not the focus of this manuscript are provided in Supplementary  
275 Material (File 4). The 1<sup>st</sup> and 99<sup>th</sup> percentiles of each predictor in the training data are provided in  
276 Supplementary Material (File 5). Further, all LASSO equations can be used through an interactive  
277 application designed by the authors and hosted on GitHub (see data sharing statement).

## 278 Discussion

279 We have developed and validated the performance of a novel set of equations to predict six different  
280 clinically important DXA-derived body composition metrics through low-cost bioelectric impedance  
281 analyses calibrated for use with men and women living in and near Hyderabad, India, demonstrating  
282 improvement from existing equations developed in other ethnic groups. Accurate measurement of  
283 these metrics is important as both fat and lean mass are strong determinants of chronic disease and  
284 used clinically in diagnosis, risk stratification, and monitoring of interventions<sup>1-3</sup>. Further, accurate

285 classification of trunk and abdominal fat adiposity may help to illuminate their relationships with  
286 cardiometabolic disease among Indian adults, for which direct evidence remains limited<sup>1</sup>. These  
287 equations will be particularly useful for large-scale epidemiological studies, especially in settings where  
288 expensive DXA scans cannot easily be performed.

289 Where work by Nigam et al found the mean difference of BIA- and DXA-predicted body fat percentage  
290 was 5.4%<sup>10</sup>, our novel model resulted in a mean absolute difference of 1.7% for men and 2.2% for  
291 women in testing data. While best performance was achieved by making use of a combination of  
292 TANITA, skinfolds, grip strength, and circumferences, our novel equations using only TANITA values as  
293 predictors still performed better in the held-out testing data than the TANITA built-in estimates and  
294 existing prediction equations for all outcomes. Furthermore, we show that even adding a single  
295 measurement to the TANITA values (namely skinfolds, and to a lesser extent circumferences) can  
296 improve body composition predictions markedly. This could be useful in resource-constrained contexts  
297 where collecting all measurements is not feasible. In addition, we have developed predictive equations  
298 for trunk and L1-L4 fat percentage in a cohort of Indian adults, which to our knowledge did not  
299 previously exist. The generally improved performance of LASSO as compared to random forest and  
300 XGBoost models allows us to provide interpretable prediction equations for wider use. The low-cost  
301 nature of the measurements used may be especially beneficial for settings where more expensive and  
302 time-consuming methods like DXA and MRI are not feasible (i.e., primary care and community settings).

303 While we identified several studies validating existing body composition metrics for use in Indian  
304 populations, our study represents one of only a few studies developing novel equations to predict DXA-  
305 derived values for use with Indian adults. While Dasgupta et al provided similar equations with lower  
306 reported RMSE than our study, their study sample consisted only of 117 males aged 18 to 22 years old<sup>25</sup>.  
307 As such, the generalizability of these equations may be more limited than the novel equations presented



308 in the current work, developed using a training sample of more than 1000 men and women of a wide  
309 age range, the largest population-based DXA dataset including both men and women available in India  
310 to our knowledge. The work of Grover et al developed equations to predict DXA-derived fat mass and  
311 fat-free mass using BIA, circumferences, and skinfolds separately in a clinical population of 302 adults  
312 with cirrhosis but did not present equations using a combination of all factors<sup>33</sup>. The equations by  
313 Kulkarni et al utilized skinfolds and waist circumference but did not explore the addition of BIA values  
314 into predictive equations<sup>28</sup>. However, the equations by Kulkarni et al resulted in MAE for appendicular  
315 lean mass within 0.1 kg of our equations using TANITA only. This is somewhat expected as these  
316 equations were calibrated using DXA as reference values and including data from some of the younger  
317 individuals in the APCAPS study. Prior development of equations for fat-free mass based on a sample of  
318 Black and White individuals by Sun et al reported RMSE of 3.9 kg for males and 2.9 kg for females<sup>8</sup>.  
319 Further, the equations developed by Rush et al for prediction of fat-free mass in an Asian Indian  
320 population report an RMSE of 2.13 in the study sample<sup>17</sup>. The RMSE for our LASSO-based equations  
321 predicting total lean mass were 1.5 kg for males and 1.6 kg for females, suggesting improved model fit.  
322 To our knowledge, the current work represents the introduction of the first set of validated BIA-based  
323 equations to predict trunk-specific body composition outcomes for Indian adult men and women.  
324 Though we have demonstrated improved performance from the TANITA output in estimating lean mass  
325 in both the full body and appendicular regions, it is unsurprising that the TANITA outputs have a  
326 noticeable systematic error. This is because the TANITA uses a two-compartment model to predict fat-  
327 free mass, combining both lean mass and skeletal mass into a single measure, whereas the DXA-derived  
328 outcome specifically uses a three-compartment model to measure lean mass as distinct from skeletal  
329 mass. Additionally, the TANITA provides no direct measure of L1-L4 fat mass as the device cannot detect  
330 this body segment. Finally, the TANITA trunk segment includes the mass of the head, while the DXA  
331 includes the head as a separate body segment. These observed systematic errors may explain the

332 performance issues of the TANITA observed in our study, though they also emphasize the relevance of  
333 the current work. Those interested in measuring lean mass without skeletal mass using TANITA now  
334 have a method of doing so despite its use of a two-compartment model.

335 However, the present work is not without limitations. Of note, not all participants from APCAPS  
336 attended the clinic for DXA measurements due to funding limitations or travel distance to the clinic. The  
337 participants who did not attend DXA clinics tended to be younger than the participants who did attend  
338 the clinics, suggesting there could be systematic differences between those included and those not  
339 included due to missing measurements, though no significant difference was found in BMI between the  
340 individuals with and without DXA measurements. Regardless, these equations are not recommended for  
341 estimating body composition among pregnant women since these women were not included in the  
342 sample used for the present development and validation of equations. The validity of these equations in  
343 the presence of values outside the range of the training data is also unclear. The training dataset mostly  
344 consisted of low-BMI individuals (99<sup>th</sup> percentile for BMI in both men and women  $\approx 31 \text{ kg/m}^2$ ). Further,  
345 the 99<sup>th</sup> percentile for age in our data is 67 years in men and 61 years in women. Therefore, predictions  
346 may not be suitable for adults with obesity as defined by BMI and those older than the study sample and  
347 we recommend interpreting model predictions with caution in such cases. We provide the minimum, 1<sup>st</sup>  
348 percentile, 99<sup>th</sup> percentile, and maximum of each predictor in the training data in the Supplementary  
349 Material (File 5).

350 Beyond the limitations related to the distribution of variables and selection into the DXA study,  
351 limitations to interpretation of results also arise from the use of an internal, rather than external,  
352 validation dataset. Our participants are largely from peri-urban areas in southeastern India, and it is  
353 unclear how well these equations will perform in other populations in India and in the diaspora, as India  
354 is an ethnically diverse country. Additionally, most participants in the APCAPS cohort were between 18-

355 30 or 40-55 years old, meaning that individuals 30-40 years old were underrepresented in the dataset.  
356 Because of these limitations, future work is needed to validate these equations in other Indian cohorts  
357 and among adults of Indian ethnicity living outside of India. Further, while prior research has shown that  
358 DXA is a good substitute for MRI-derived measures of abdominal fat in Indian populations, researchers  
359 may still prefer equations developed using MRI for measurement of abdominal fat as the gold standard  
360 since DXA may tend to overestimate fat mass in leaner individuals<sup>30</sup>. Additional research may also  
361 investigate the performance of these equations against MRI-derived measures of each outcome.

362 Finally, future validation work is crucial to assess the validity of these equations when deriving BIA  
363 estimates from other devices. The present study made use of the TANITA BC-418 device, which although  
364 widespread, has since been discontinued by the manufacturer and replaced with the MC-780U. This  
365 newer model has been described by the manufacturer as a direct replacement and provides the same  
366 50KHz measurement frequency, suggesting our equations could be used across both devices. Further,  
367 the additional measures provided by the new model, such as measurement of impedance using  
368 additional frequency values, may present opportunities for development of equations using an  
369 expanded set of inputs in the future. Additionally, validation work is needed to assess the performance  
370 of these equations when using BIA-based inputs from manufacturers other than TANITA in case of  
371 systematic differences between devices. It is the authors' expectation that the equations will perform  
372 well with inputs from any BIA device that can provide segmental estimates, as the underlying approach  
373 to impedance estimation is similar, and studies have reported high correspondence in body composition  
374 estimates across manufacturers, though one study suggested estimates from Omron devices may differ  
375 from other manufacturers<sup>34</sup>. Additionally, it is of note that one study in Finnish adults has demonstrated  
376 differences between estimates of fat mass percentage between TANITA and InBody BIA devices,  
377 suggesting caution may be needed when using our equations with InBody devices<sup>35</sup>. Our equations are

378 not suitable for use with BIA devices which provide only full-body measurements, as information about  
379 the separate body segments are required as input.

### 380 Conclusions

381 In summary, we have developed and validated several novel prediction equations for a variety of body  
382 composition metrics specifically for an Indian population using a large sample size. We encourage the  
383 use of our equations based on the LASSO algorithm and make these equations available for use. These  
384 equations are expected to deliver improved prediction of various body composition outcomes on  
385 average when used with non-pregnant Indian adults. Differences in body composition between different  
386 ethnicities due to a combination of factors, including differences between different Asian ethnicities,  
387 underscore the importance of developing such equations specifically for adults of Indian ethnicity<sup>36</sup>.

388

### 389 Declarations

#### 390 Ethics approval and consent to participate

391 The APCAPS third wave follow-up study was conducted according to the guidelines laid down in the  
392 Declaration of Helsinki and all procedures involving human participants were approved by ethics  
393 committees of the Indian Council of Medical Research - National Institute of Nutrition, India (reference  
394 number: A2-2009), the Public Health Foundation of India, India (reference number 52/10), and the  
395 London School of Hygiene and Tropical Medicine, UK (reference number: 6471). Written informed  
396 consent was obtained from all participants (or witnessed thumbprint if illiterate).

#### 397 Consent for publication

398 Not applicable.

399 Availability of data and materials

400 The APCAPS cohort data analysed in this manuscript are available to bona fide researchers upon request  
401 through completion of a collaborator form (<https://apcaps.lshtm.ac.uk/apply-to-collaborate/>). The  
402 equations developed in this manuscript are available through an open-source web application on GitHub  
403 (<https://github.com/nwbirk>).

404 Competing interests

405 The authors declare that they have no competing interest.

406 Funding

407 The Andhra Pradesh Children and Parents' Study third follow-up was funded by the Wellcome Trust  
408 [strategic award 084774]. Authors NB, PACM and SK receive part of their salary from the Medical  
409 Research Council (MRC) UK [grant reference MR/V001221/1]. Neither the Wellcome Trust nor the MRC  
410 had any role in the design, analysis or writing of this article.

411 Authors' Contributions

412 NB, PACM and SK conceived the study. NB conducted the study (including analysis of data), wrote the  
413 first draft of the manuscript and is responsible for the overall content as guarantor. PACM and SK  
414 contributed to study planning. SB, AA, GKW, VG and UR were involved in primary data collection and  
415 management. All authors (NB, BK, SB, AA, GKW, VG, UR, HM, SK, PACM) contributed to the writing of  
416 subsequent drafts of the manuscript, the interpretation of results, and have given approval for the final  
417 version to be published.

418 Acknowledgments

419 We are grateful to the participants of the Andhra Pradesh Children and Parents' Study, the data  
420 collection and administrative teams, and the study sponsors. We also gratefully acknowledge the in-kind  
421 support of the Indian Council of Medical Research-National Institute of Nutrition.

## References

1. Misra A, Khurana L. The Metabolic Syndrome in South Asians: Epidemiology, Determinants, and Prevention. *Metab Syndr Relat Disord*. 2009;7(6):497-514. doi:10.1089/met.2009.0024
2. Matsuzaki M, Kulkarni B, Kuper H, et al. Association of Hip Bone Mineral Density and Body Composition in a Rural Indian Population: The Andhra Pradesh Children and Parents Study (APCAPS). *PLoS One*. 2017;12(1):e0167114. doi:10.1371/journal.pone.0167114
3. Wolfe RR. The underappreciated role of muscle in health and disease. *Am J Clin Nutr*. 2006;84(3):475-482. doi:10.1093/ajcn/84.3.475
4. Romero-Corral A, Somers VK, Sierra-Johnson J, et al. Accuracy of body mass index in diagnosing obesity in the adult general population. *Int J Obes* 2005. 2008;32(6):959-966. doi:10.1038/ijo.2008.11
5. Yajnik CS, Yudkin JS. The Y-Y paradox. *Lancet Lond Engl*. 2004;363(9403):163. doi:10.1016/S0140-6736(03)15269-5
6. Ward LC. Bioelectrical impedance analysis for body composition assessment: reflections on accuracy, clinical utility, and standardisation. *Eur J Clin Nutr*. 2019;73(2):194-199. doi:10.1038/s41430-018-0335-3
7. Pietrobelli A, Rubiano F, St-Onge MP, Heymsfield SB. New bioimpedance analysis system: improved phenotyping with whole-body analysis. *Eur J Clin Nutr*. 2004;58(11):1479-1484. doi:10.1038/sj.ejcn.1601993

8. Sun SS, Chumlea WC, Heymsfield SB, et al. Development of bioelectrical impedance analysis prediction equations for body composition with the use of a multicomponent model for use in epidemiologic surveys. *Am J Clin Nutr.* 2003;77(2):331-340. doi:10.1093/ajcn/77.2.331
9. Haroun D, Taylor SJC, Viner RM, et al. Validation of bioelectrical impedance analysis in adolescents across different ethnic groups. *Obes Silver Spring Md.* 2010;18(6):1252-1259. doi:10.1038/oby.2009.344
10. Nigam P, Misra A, Colles SL. Comparison of DEXA-derived body fat measurement to two race-specific bioelectrical impedance equations in healthy Indians. *Diabetes Metab Syndr.* 2013;7(2):72-77. doi:10.1016/j.dsx.2013.02.031
11. Kuriyan R, Thomas T, Ashok S, Jayakumar J, Kurpad AV. A 4-compartment model based validation of air displacement plethysmography, dual energy X-ray absorptiometry, skinfold technique & bioelectrical impedance for measuring body fat in Indian adults. *Indian J Med Res.* 2014;139(5):700-707.
12. Bhat DS, Yajnik CS, Sayyad MG, et al. Body fat measurement in Indian men: comparison of three methods based on a two-compartment model. *Int J Obes 2005.* 2005;29(7):842-848. doi:10.1038/sj.ijo.0802953
13. Kehoe SH, Krishnaveni GV, Lubree HG, et al. Prediction of body-fat percentage from skinfold and bio-impedance measurements in Indian school children. *Eur J Clin Nutr.* 2011;65(12):1263-1270. doi:10.1038/ejcn.2011.119



14. Iyengar A, Kuriyan R, Kurpad AV, Vasudevan A. Body Fat in Children with Chronic Kidney Disease - A Comparative Study of Bio-impedance Analysis with Dual Energy X-ray Absorptiometry. *Indian J Nephrol.* 2021;31(1):39-42. doi:10.4103/ijn.IJN\_368\_19
15. Chiplonkar S, Kajale N, Ekbote V, et al. Validation of Bioelectric Impedance Analysis against Dual-energy X-Ray Absorptiometry for Assessment of Body Composition in Indian Children Aged 5 to 18 Years. *Indian Pediatr.* 2017;54(11):919-924. doi:10.1007/s13312-017-1182-3
16. Deurenberg P, Deurenberg-Yap M, Schouten F. Validity of total and segmental impedance measurements for prediction of body composition across ethnic population groups. *Eur J Clin Nutr.* 2002;56(3):214-220. doi:10.1038/sj.ejcn.1601303
17. Rush EC, Chandu V, Plank LD. Prediction of fat-free mass by bioimpedance analysis in migrant Asian Indian men and women: a cross validation study. *Int J Obes* 2005. 2006;30(7):1125-1131. doi:10.1038/sj.ijo.0803230
18. Rush EC, Freitas I, Plank LD. Body size, body composition and fat distribution: comparative analysis of European, Maori, Pacific Island and Asian Indian adults. *Br J Nutr.* 2009;102(4):632-641. doi:10.1017/S0007114508207221
19. Marwaha RK, Tandon N, Garg MK, Narang A, Mehan N, Bhadra K. Normative data of body fat mass and its distribution as assessed by DXA in Indian adult population. *J Clin Densitom Off J Int Soc Clin Densitom.* 2014;17(1):136-142. doi:10.1016/j.jocd.2013.01.002
20. Hunma S, Ramuth H, Miles-Chan JL, et al. Body composition-derived BMI cut-offs for overweight and obesity in Indians and Creoles of Mauritius: comparison with Caucasians. *Int J Obes* 2005. 2016;40(12):1906-1914. doi:10.1038/ijo.2016.176

21. Shah AD, Kandula NR, Lin F, et al. Less favorable body composition and adipokines in South Asians compared with other US ethnic groups: results from the MASALA and MESA studies. *Int J Obes.* 2016;40(4):639-645. doi:10.1038/ijo.2015.219
22. Kapoor N. Thin Fat Obesity: The Tropical Phenotype of Obesity. In: Feingold KR, Anawalt B, Boyce A, et al., eds. *Endotext*. MDText.com, Inc.; 2000. Accessed January 12, 2023. <http://www.ncbi.nlm.nih.gov/books/NBK568563/>
23. Kapoor N, Furler J, Paul TV, Thomas N, Oldenburg B. Normal Weight Obesity: An Underrecognized Problem in Individuals of South Asian Descent. *Clin Ther.* 2019;41(8):1638-1642. doi:10.1016/j.clinthera.2019.05.016
24. Bhopal RS. *Epidemic of Cardiovascular Disease and Diabetes: Explaining the Phenomenon in South Asians Worldwide*. First edition. Oxford University Press; 2019.
25. Dasgupta R, Anoop S, Samuel P, et al. Bioimpedance analysis with a novel predictive equation - A reliable technique to estimate fat free mass in birth weight based cohorts of Asian Indian males. *Diabetes Metab Syndr.* 2019;13(1):738-742. doi:10.1016/j.dsx.2018.11.070
26. Durnin JV, Womersley J. Body fat assessed from total body density and its estimation from skinfold thickness: measurements on 481 men and women aged from 16 to 72 years. *Br J Nutr.* 1974;32(1):77-97. doi:10.1079/bjn19740060
27. Davidson LE, Wang J, Thornton JC, et al. Predicting Fat Percent by Skinfolts in Racial Groups: Durnin and Womersley Revisited. *Med Sci Sports Exerc.* 2011;43(3):542-549. doi:10.1249/MSS.0b013e3181ef3f07

28. Kulkarni B, Kuper H, Taylor A, et al. Development and validation of anthropometric prediction equations for estimation of lean body mass and appendicular lean soft tissue in Indian men and women. *J Appl Physiol Bethesda Md 1985*. 2013;115(8):1156-1162.  
doi:10.1152/jappphysiol.00777.2013
29. Kinra S, Radha Krishna KV, Kuper H, et al. Cohort profile: Andhra Pradesh Children and Parents Study (APCAPS). *Int J Epidemiol*. 2014;43(5):1417-1424. doi:10.1093/ije/dyt128
30. Taylor AE, Kuper H, Varma RD, et al. Validation of dual energy X-ray absorptiometry measures of abdominal fat by comparison with magnetic resonance imaging in an Indian population. *PloS One*. 2012;7(12):e51042. doi:10.1371/journal.pone.0051042
31. Glickman SG, Marn CS, Supiano MA, Dengel DR. Validity and reliability of dual-energy X-ray absorptiometry for the assessment of abdominal adiposity. *J Appl Physiol Bethesda Md 1985*. 2004;97(2):509-514. doi:10.1152/jappphysiol.01234.2003
32. Paradisi G, Smith L, Burtner C, et al. Dual energy X-ray absorptiometry assessment of fat mass distribution and its association with the insulin resistance syndrome. *Diabetes Care*. 1999;22(8):1310-1317. doi:10.2337/diacare.22.8.1310
33. Grover I, Singh N, Gunjan D, Pandey RM, Chandra Sati H, Saraya A. Comparison of Anthropometry, Bioelectrical Impedance, and Dual-energy X-ray Absorptiometry for Body Composition in Cirrhosis. *J Clin Exp Hepatol*. 2022;12(2):467-474. doi:10.1016/j.jceh.2021.05.012
34. Alivia Blakely. *Validity of Various Bioelectrical Impedance Analysis Devices vs the Bod Pod for Body Composition*. Masters. Cleveland State University; 2019.  
<https://engagedscholarship.csuohio.edu/etdarchive/1161/>

35. Volgyi E, Tylavsky FA, Lyytikainen A, Suominen H, Alen M, Cheng S. Assessing Body Composition With DXA and Bioimpedance: Effects of Obesity, Physical Activity, and Age. *Obesity*. 2008;16(3):700-705. doi:10.1038/oby.2007.94
  
36. Deurenberg P, Deurenberg-Yap M, Guricci S. Asians are different from Caucasians and from each other in their body mass index/body fat per cent relationship. *Obes Rev Off J Int Assoc Study Obes*. 2002;3(3):141-146. doi:10.1046/j.1467-789x.2002.00065.x

## Supplementary Material

Supplementary File 1 - List of data quality rules applied for inclusion in the study (Microsoft Word Document)

Supplementary File 2 - Coefficients for each outcome in full model (Microsoft Excel Worksheet)

Supplementary File 3 - Performance (Mean Absolute Error) of the LASSO with alternate sets of predictors (Microsoft Excel Worksheet)

Supplementary File 4 - Information about model performance for other outcomes (trunk fat mass (kg), trunk lean mass (kg), L1-L4 fat mass (kg), L1-L4 lean mass (kg), appendicular fat mass (kg), and appendicular fat mass percentage (%)) (Microsoft Excel Worksheet)

Supplementary File 5 - Minimum, 1st percentile, 99th percentile, and maximum of each predictor in the training data (Microsoft Excel Worksheet)

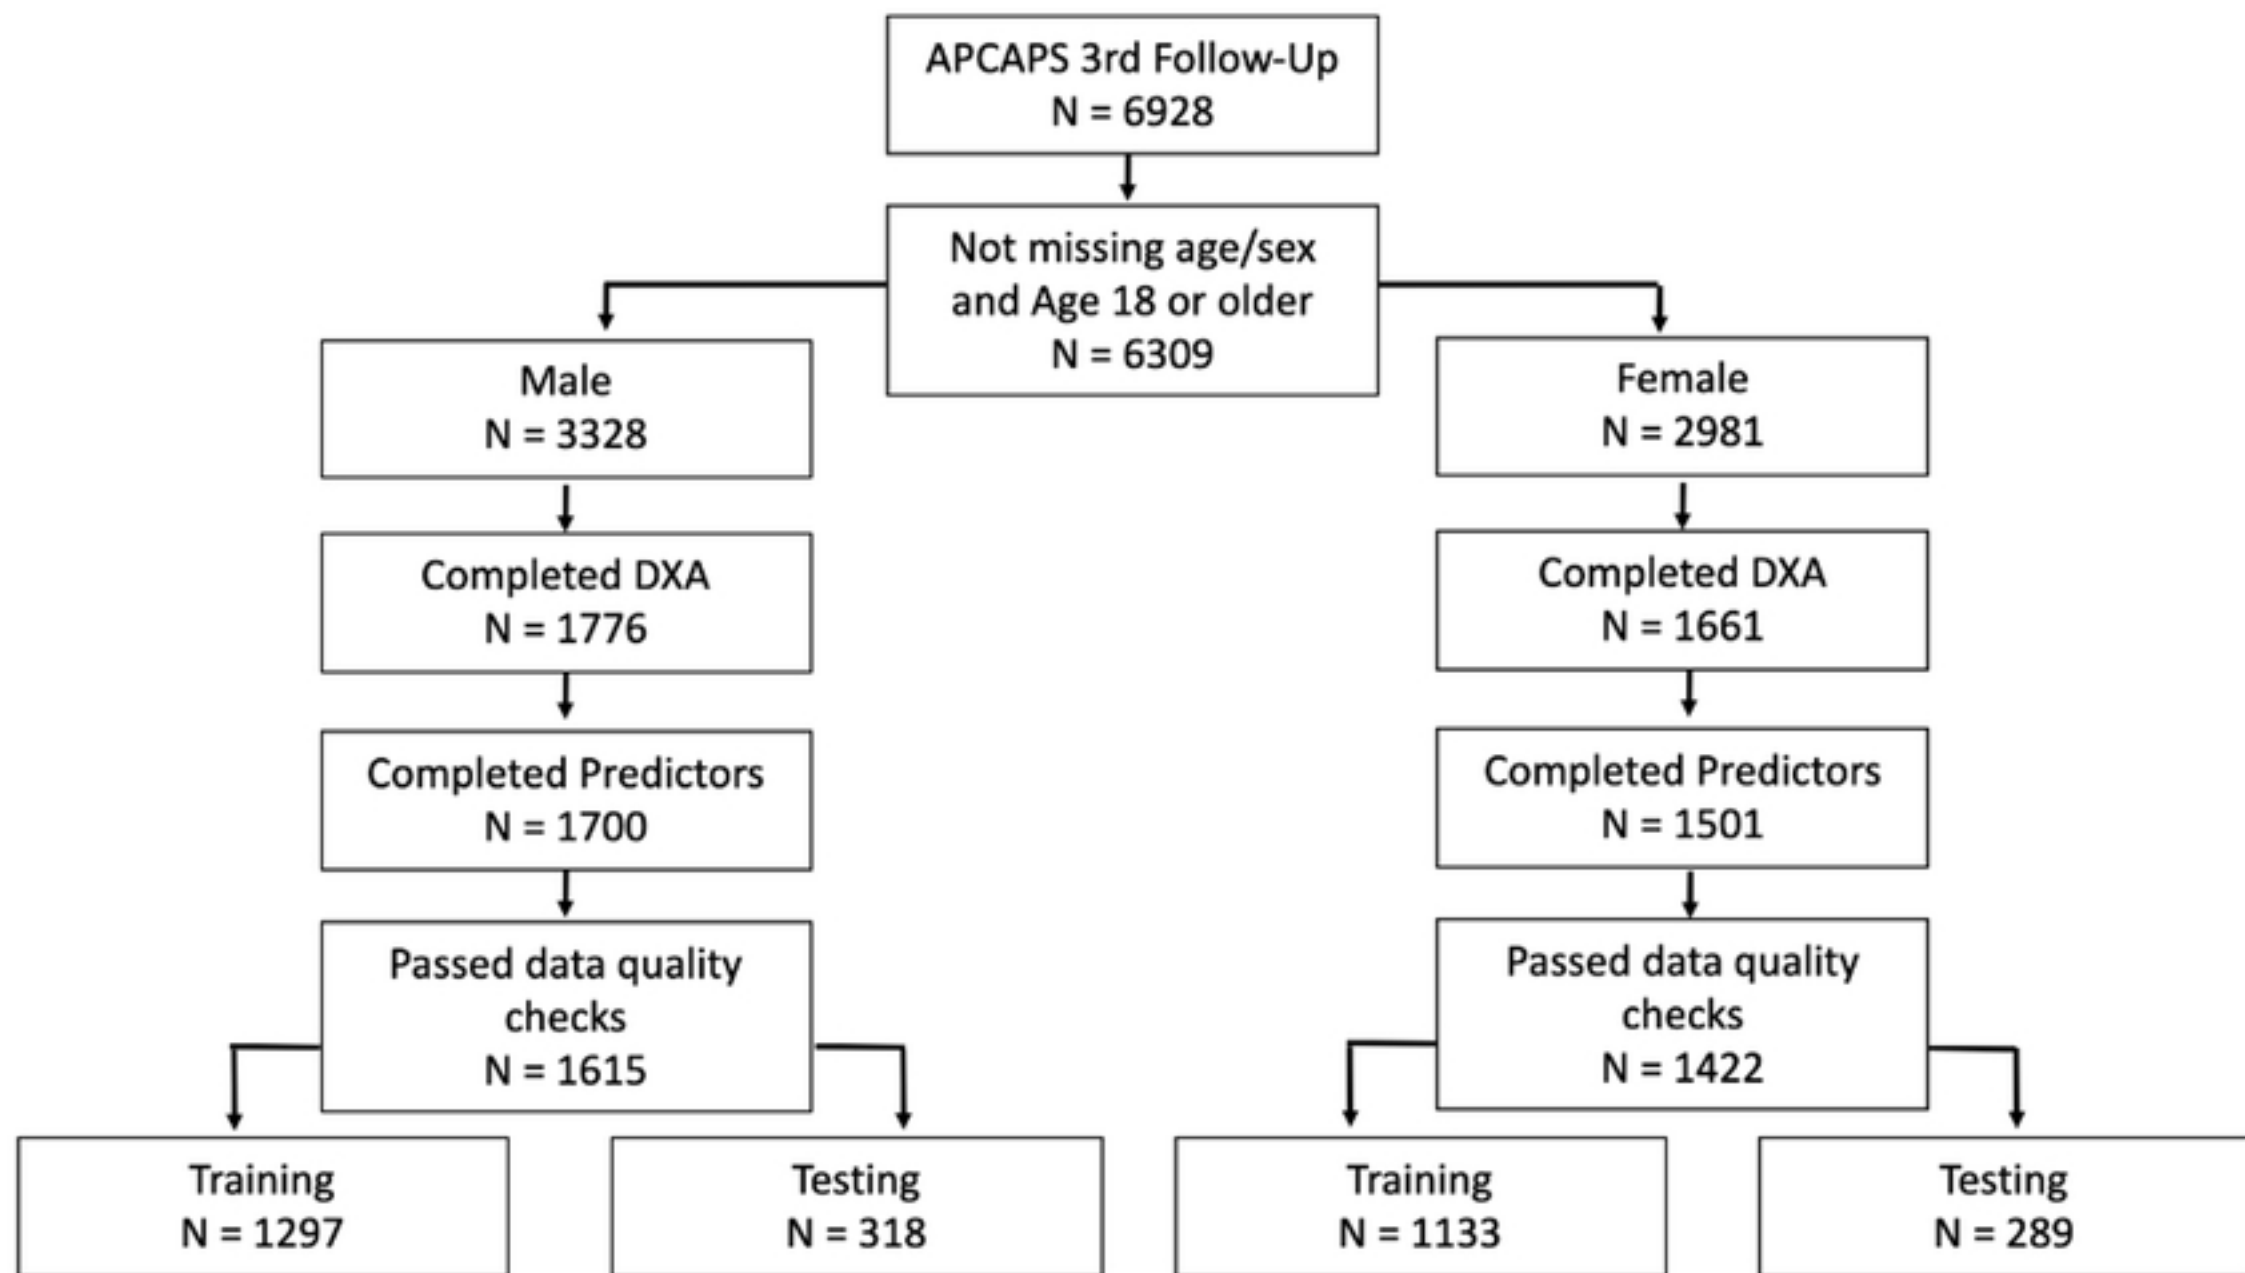

Figure 1

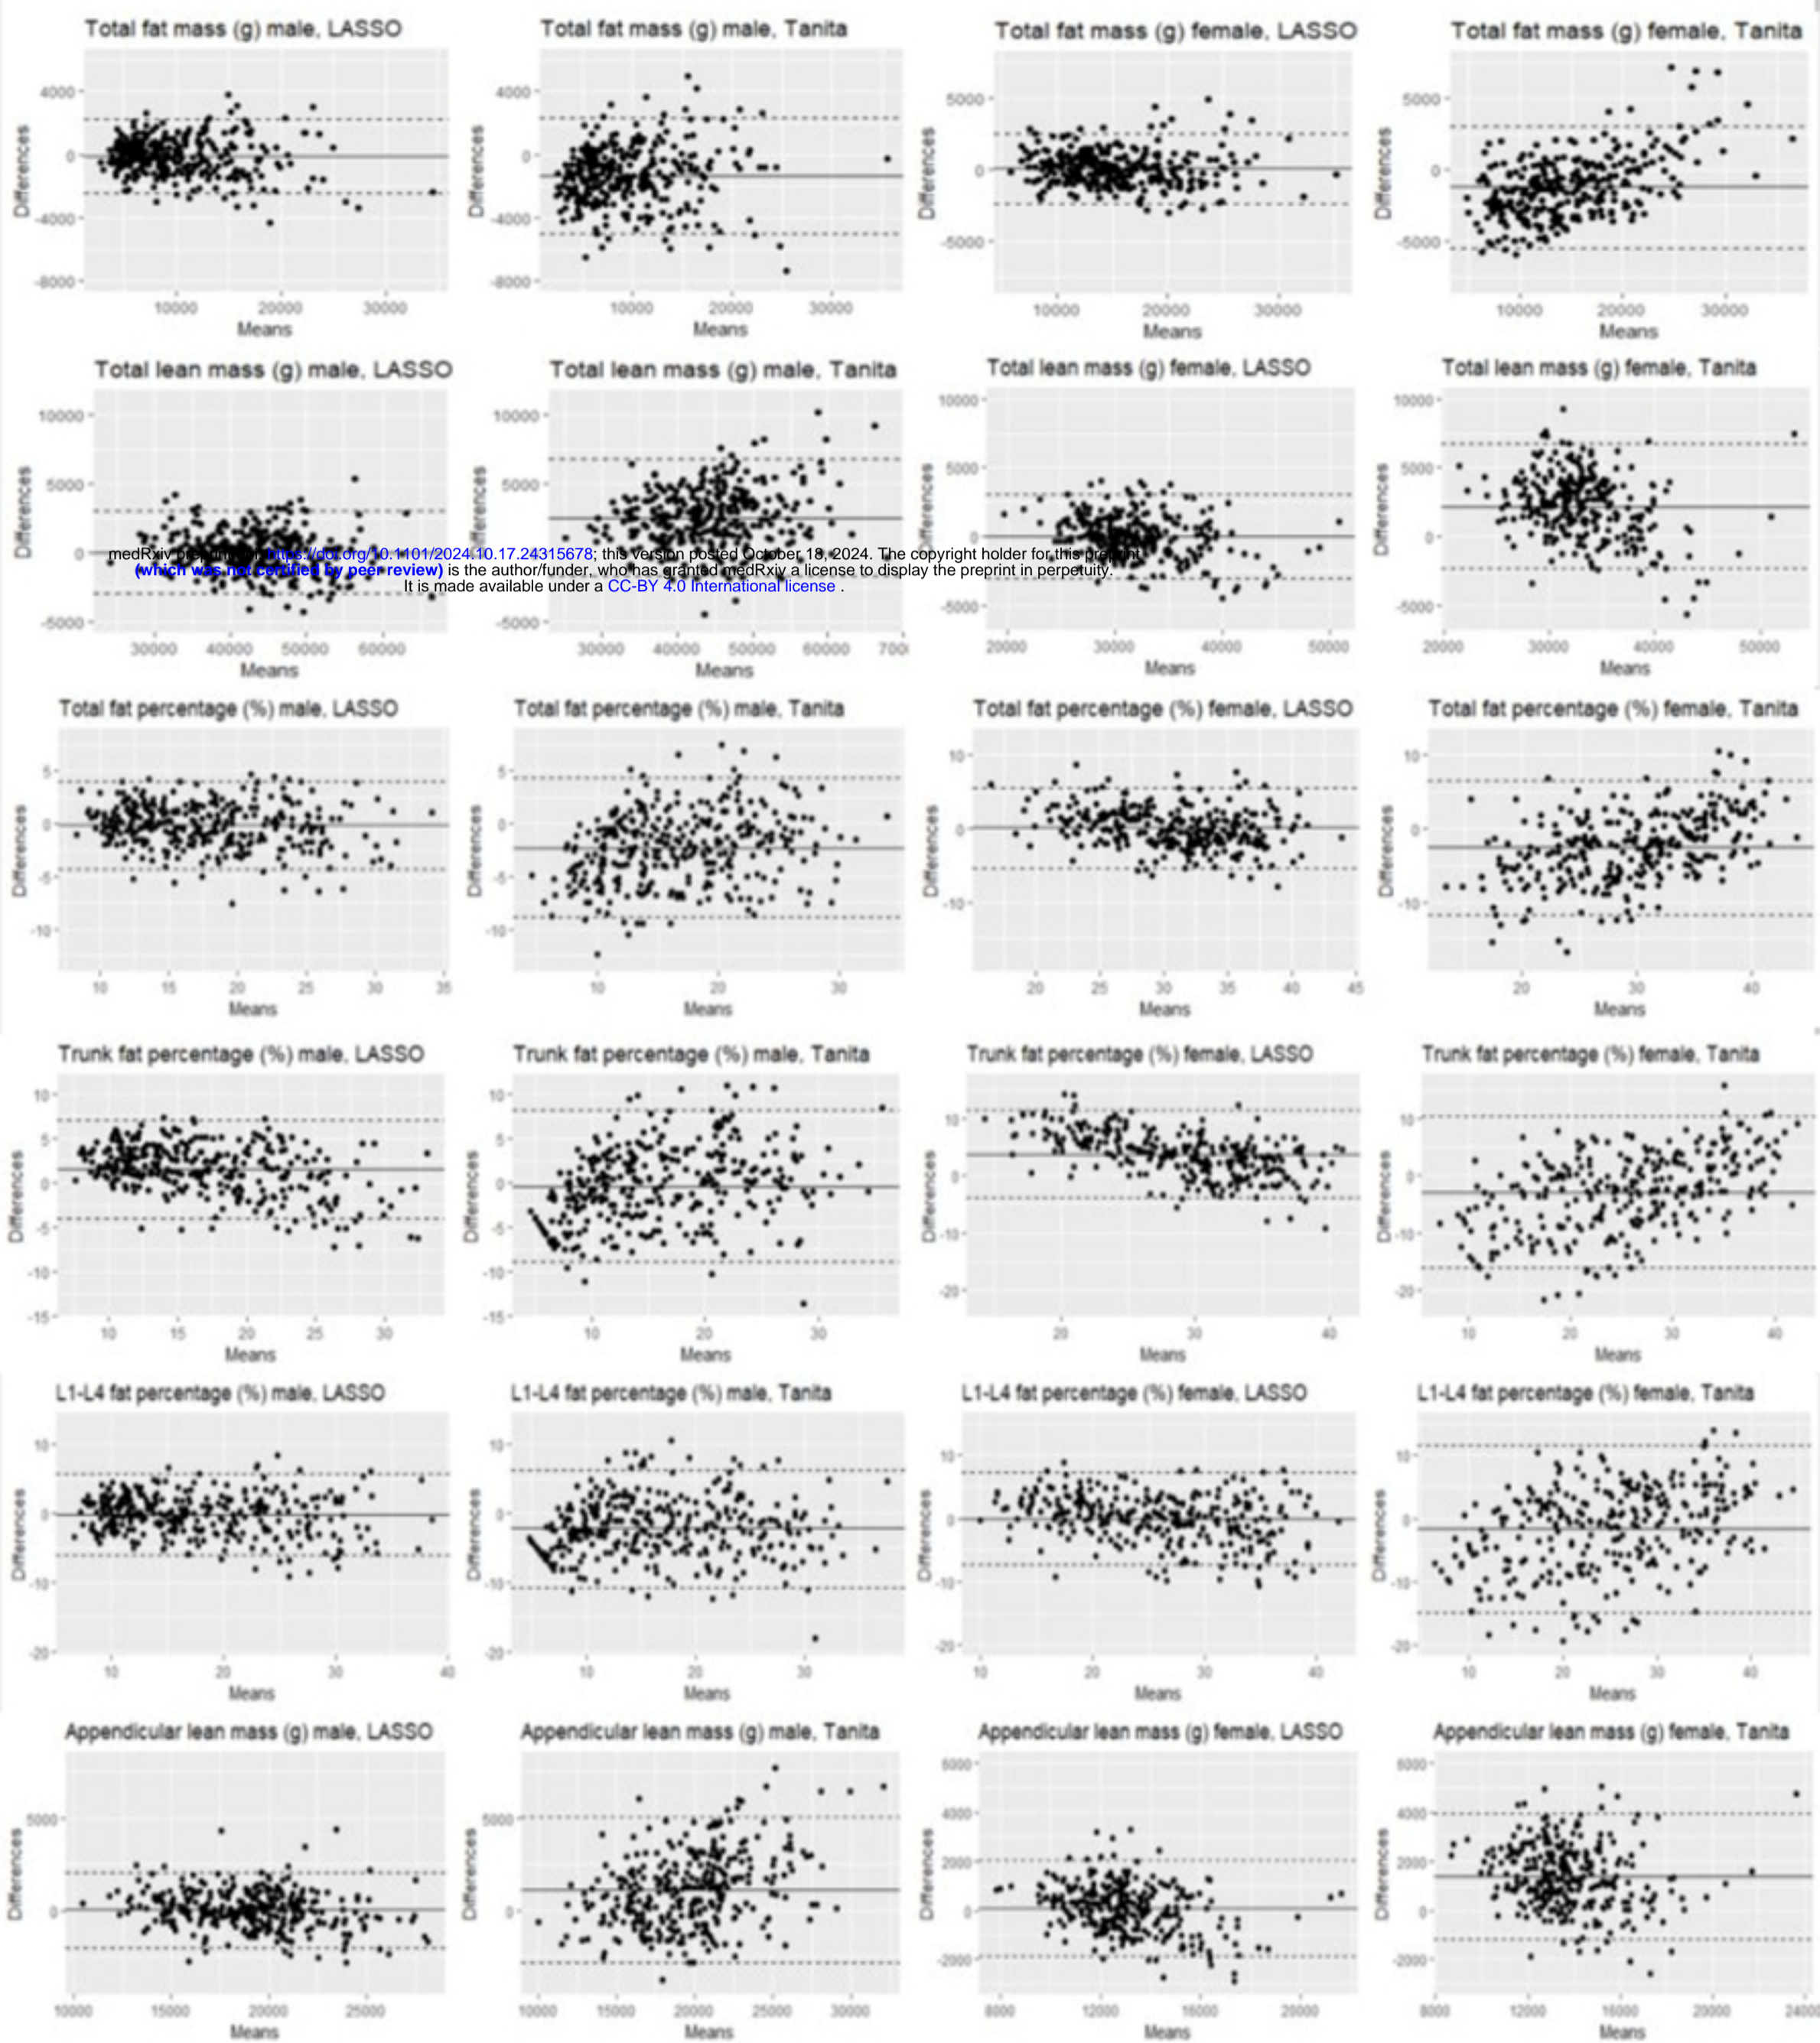

Figure 2
